# Supplementary material for: Remote and unsupervised digital memory assessments can reliably detect cognitive impairment in Alzheimer’s disease
Source: bioRxiv or medRxiv preprint supplement (doi:10.1101/2024.01.08.24300982), 2024-01-09
Supplement: Supplementary file [file media-1.pdf]

# Remote and unsupervised digital memory assessments can reliably detect cognitive impairment in Alzheimer's disease

David Berron<sup>1,2</sup>, Emil Olsson<sup>1</sup>, Felix Andersson<sup>3</sup>, Shorena Janelidze<sup>1</sup>, Pontus Tideman<sup>1,3</sup>,  
Emrah Düzel<sup>2,3,4</sup>, Sebastian Palmqvist<sup>1,5</sup>, Erik Stomrud<sup>1,5</sup>, Oskar Hansson<sup>1,5</sup>

<sup>1</sup>*Clinical Memory Research Unit, Department of Clinical Sciences Malmö, Lund University, 223 62 Lund, Sweden*

<sup>2</sup>*German Center for Neurodegenerative Diseases, 39120 Magdeburg, Germany*

<sup>3</sup>*Institute for Cognitive Neurology and Dementia Research, Otto-von-Guericke University, Magdeburg, Germany*

<sup>4</sup>*Institute of Cognitive Neuroscience, University College London, United Kingdom*

<sup>5</sup>*Memory Clinic, Skåne University Hospital, 205 02 Malmö, Sweden*

## ***Supplementary material***

**Supplementary table 1: Longitudinal random slope linear mixed models in the entire sample predicting future cognitive decline including baseline plasma and digital remote markers and years since baseline as predictors, demographic covariates, and mPACC slopes as an outcome. The term of interest is the interaction between baseline markers and years since baseline.**

| Predictor                                            | MDT-S                                      |                 |                  | MDT-O                                      |                 |                  | ORR-DR                                     |                 |                  | p-tau217                                   |                 |                  |
|------------------------------------------------------|--------------------------------------------|-----------------|------------------|--------------------------------------------|-----------------|------------------|--------------------------------------------|-----------------|------------------|--------------------------------------------|-----------------|------------------|
|                                                      | Estimate                                   | CI              | p                | Estimate                                   | CI              | p                | Estimate                                   | CI              | p                | Estimate                                   | CI              | p                |
| (Intercept)                                          | 0.658                                      | -0.689 – 2.006  | 0.337            | -0.373                                     | -1.724 – -0.977 | 0.587            | -1.224                                     | -3.147 – 0.699  | 0.211            | 1.757                                      | 0.370 – 3.144   | <b>0.013</b>     |
| YearsSince Baseline                                  | -0.166                                     | -0.275 – -0.058 | <b>0.003</b>     | -0.149                                     | -0.293 – -0.004 | <b>0.043</b>     | -0.302                                     | -0.532 – -0.072 | <b>0.010</b>     | 0.042                                      | -0.021 – 0.105  | 0.195            |
| MDT-S                                                | 1.440                                      | 0.707 – 2.174   | <b>&lt;0.001</b> |                                            |                 |                  |                                            |                 |                  |                                            |                 |                  |
| diagnosis [CU+]                                      | -0.327                                     | -0.675 – 0.021  | 0.066            | -0.159                                     | -0.487 – 0.169  | 0.340            | -0.401                                     | -0.821 – 0.020  | 0.062            | -0.071                                     | -0.480 – 0.339  | 0.735            |
| diagnosis [MCI-]                                     | -1.480                                     | -1.980 – -0.981 | <b>&lt;0.001</b> | -1.395                                     | -1.865 – -0.926 | <b>&lt;0.001</b> | -1.446                                     | -1.997 – -0.895 | <b>&lt;0.001</b> | -1.565                                     | -2.122 – -1.007 | <b>&lt;0.001</b> |
| diagnosis [MCI+]                                     | -1.665                                     | -2.099 – -1.232 | <b>&lt;0.001</b> | -1.445                                     | -1.856 – -1.034 | <b>&lt;0.001</b> | -1.348                                     | -1.925 – -0.772 | <b>&lt;0.001</b> | -1.237                                     | -1.903 – -0.571 | <b>&lt;0.001</b> |
| age                                                  | -0.021                                     | -0.037 – -0.005 | <b>0.010</b>     | -0.016                                     | -0.031 – -0.001 | <b>0.034</b>     | -0.012                                     | -0.032 – 0.007  | 0.218            | -0.033                                     | -0.049 – -0.016 | <b>&lt;0.001</b> |
| sex [female]                                         | 0.128                                      | -0.157 – 0.413  | 0.379            | 0.213                                      | -0.057 – 0.483  | 0.122            | 0.053                                      | -0.295 – 0.401  | 0.763            | 0.062                                      | -0.260 – 0.384  | 0.705            |
| Education [years]                                    | 0.020                                      | -0.024 – 0.064  | 0.374            | 0.022                                      | -0.019 – 0.063  | 0.283            | 0.026                                      | -0.025 – 0.077  | 0.309            | 0.049                                      | -0.003 – 0.100  | 0.062            |
| YearsSince Baseline * MDT-S                          | 0.245                                      | 0.010 – 0.481   | <b>0.041</b>     |                                            |                 |                  |                                            |                 |                  |                                            |                 |                  |
| MDT-O                                                |                                            |                 |                  | 2.211                                      | 1.447 – 2.976   | <b>&lt;0.001</b> |                                            |                 |                  |                                            |                 |                  |
| YearsSince Baseline * MDT-O                          |                                            |                 |                  | 0.152                                      | -0.109 – 0.413  | 0.253            |                                            |                 |                  |                                            |                 |                  |
| ORR-DR                                               |                                            |                 |                  |                                            |                 |                  | 0.121                                      | 0.069 – 0.173   | <b>&lt;0.001</b> |                                            |                 |                  |
| YearsSince Baseline * ORR-DR                         |                                            |                 |                  |                                            |                 |                  | 0.017                                      | 0.002 – 0.032   | <b>0.027</b>     |                                            |                 |                  |
| p-tau217                                             |                                            |                 |                  |                                            |                 |                  |                                            |                 |                  | -0.101                                     | -0.252 – 0.049  | 0.187            |
| YearsSince Baseline * p-tau217                       |                                            |                 |                  |                                            |                 |                  |                                            |                 |                  | -0.042                                     | -0.076 – -0.009 | <b>0.013</b>     |
| Random Effects                                       |                                            |                 |                  |                                            |                 |                  |                                            |                 |                  |                                            |                 |                  |
| $\sigma^2$                                           | 0.196                                      |                 |                  | 0.192                                      |                 |                  | 0.176                                      |                 |                  | 0.157                                      |                 |                  |
| $\tau_{00}$                                          | 0.344 <sub>UserID</sub>                    |                 |                  | 0.271 <sub>UserID</sub>                    |                 |                  | 0.301 <sub>UserID</sub>                    |                 |                  | 0.421 <sub>UserID</sub>                    |                 |                  |
| $\tau_{11}$                                          | 0.035 <sub>UserID:YearsSinceBaseline</sub> |                 |                  | 0.040 <sub>UserID:YearsSinceBaseline</sub> |                 |                  | 0.035 <sub>UserID:YearsSinceBaseline</sub> |                 |                  | 0.014 <sub>UserID:YearsSinceBaseline</sub> |                 |                  |
| $\rho_{01}$                                          | 0.094 <sub>UserID</sub>                    |                 |                  | 0.231 <sub>UserID</sub>                    |                 |                  | 0.133 <sub>UserID</sub>                    |                 |                  | 0.145 <sub>UserID</sub>                    |                 |                  |
| ICC                                                  | 0.751                                      |                 |                  | 0.756                                      |                 |                  | 0.758                                      |                 |                  | 0.780                                      |                 |                  |
| N                                                    | 99 <sub>UserID</sub>                       |                 |                  | 99 <sub>UserID</sub>                       |                 |                  | 65 <sub>UserID</sub>                       |                 |                  | 85 <sub>UserID</sub>                       |                 |                  |
| Observations                                         | 325                                        |                 |                  | 325                                        |                 |                  | 211                                        |                 |                  | 276                                        |                 |                  |
| Marginal R <sup>2</sup> / Conditional R <sup>2</sup> | 0.545 / 0.887                              |                 |                  | 0.552 / 0.891                              |                 |                  | 0.623 / 0.909                              |                 |                  | 0.488 / 0.887                              |                 |                  |
| AIC                                                  | 717.263                                    |                 |                  | 707.624                                    |                 |                  | 472.243                                    |                 |                  | 565.454                                    |                 |                  |

**Supplementary table 2: Demographics of the sample that performed the MDT-OS and ORR-DR**

|                          | <b>CU A<math>\beta</math>-<br/>(N=31)</b> | <b>CU A<math>\beta</math>+<br/>(N=19)</b> | <b>MCI A<math>\beta</math>-<br/>(N=7)</b> | <b>MCI A<math>\beta</math>+<br/>(N=9)</b> | <b>Total<br/>(N=66)</b> |
|--------------------------|-------------------------------------------|-------------------------------------------|-------------------------------------------|-------------------------------------------|-------------------------|
| <i>Age (years)</i>       | 61.3 (10.9)                               | 71.4 (7.4)                                | 64 (13.1)                                 | 67.8 (4.3)                                | 65.4 (10.4)             |
| <i>Education (years)</i> | 13.1 (3.1)                                | 12.8 (3.6)                                | 12.7 (3)                                  | 13.6 (4)                                  | 13 (3.3)                |
| <i>Sex (% female)</i>    | 51.6 %                                    | 68.4 %                                    | 71.4 %                                    | 22.2 %                                    | 54.5 %                  |
| <i>MMSE</i>              | 29 (1.2)                                  | 28.3 (1.8)                                | 26.4 (2.1)                                | 27.6 (1.5)                                | 28.3 (1.7)              |
